# Supplementary material for: In situ template synthesis of hierarchical porous carbon used for high performance lithium–sulfur batteries
Source: Royal Society of Chemistry journal article supplement (doi:10.1039/c7ra12978e), 2018-01-01
Supplement: c7ra12978e1.pdf [file c7ra12978e1.pdf]

## **In-situ Template Synthesis of Hierarchical Porous Carbon Used for High Performance Lithium-sulfur Batteries**

Lizhen Long<sup>a,\*</sup>, Xunyuan Jiang<sup>b</sup>, Jun Liu<sup>a</sup>, Dongmei Han<sup>b,\*</sup>, Min Xiao<sup>b</sup>, Shuanjin Wang<sup>b</sup>,  
Yuezhong Meng<sup>b,\*</sup>

<sup>a</sup> *College of Physics and Technology, Guangxi Normal University, Guilin 541004, PR China*

<sup>b</sup> *The Key Laboratory of Low-carbon Chemistry & Energy Conservation of Guangdong  
Province/State Key Laboratory of Optoelectronic Materials and Technologies, Sun Yat-sen  
University, Guangzhou 510275, PR China*

\*Corresponding author: Telephone & Fax: +86-20-84114113

E-mail: mengyzh@mail.sysu.edu.cn (Yuezhong Meng)

handongm@mail.sysu.edu.cn

longlzh@foxmail.com

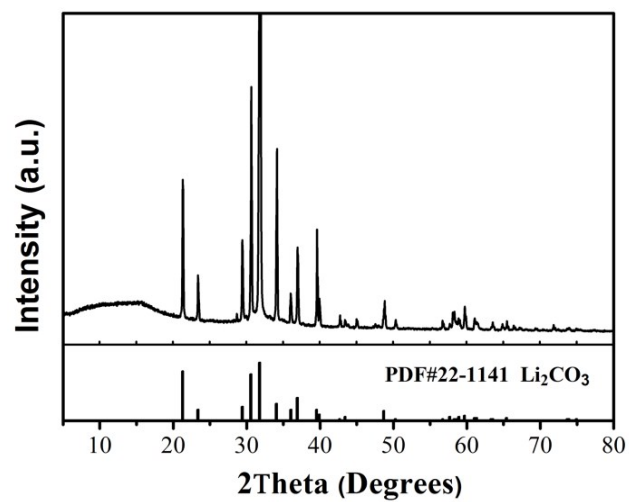

Figure S1. XRD pattern of HPC-3 before acid-treatment.

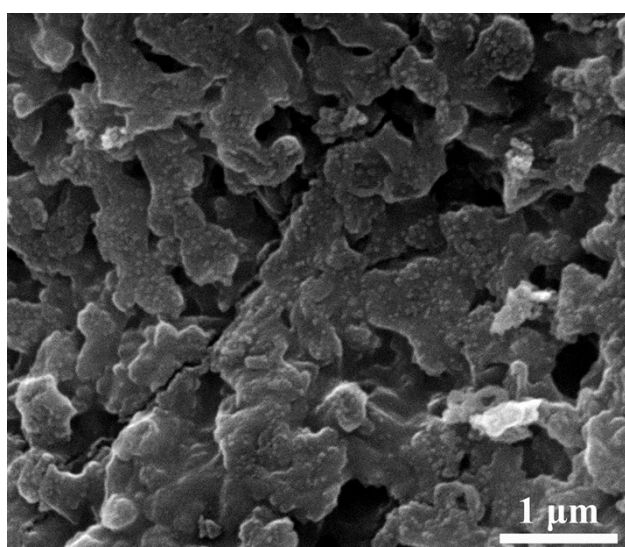

Figure S2. SEM image of HPC-3 before acid-treatment.

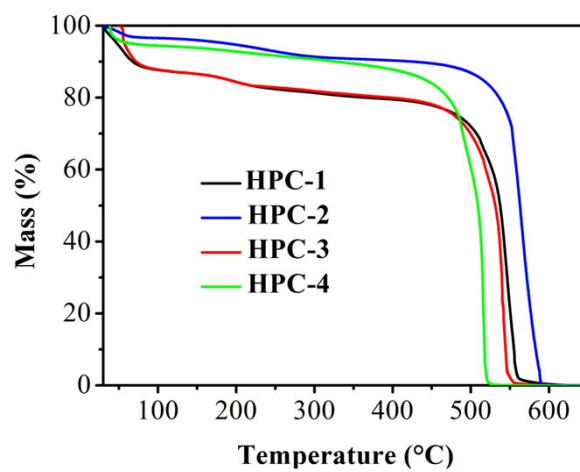

Figure S3 Thermogravimetric analysis of HPC-1, HPC-2, HPC-3 and HPC-4 in air.

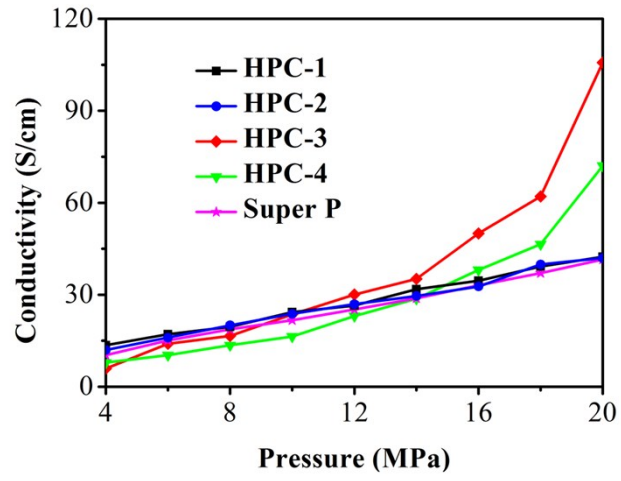

Figure S4. Electric conductivity of HPCs samples and super P.
